# Supplementary material
Source: Springer Nature journal article supplement (https://www.springermedizin.de/resource/supplementary/13006_2011_132_MOESM2_ESM.pdf/9628086)
Supplement: MOESM2 [file 9628086]

**Figure III: Feeding practices amongst HIV-positive and HIV-negative women**

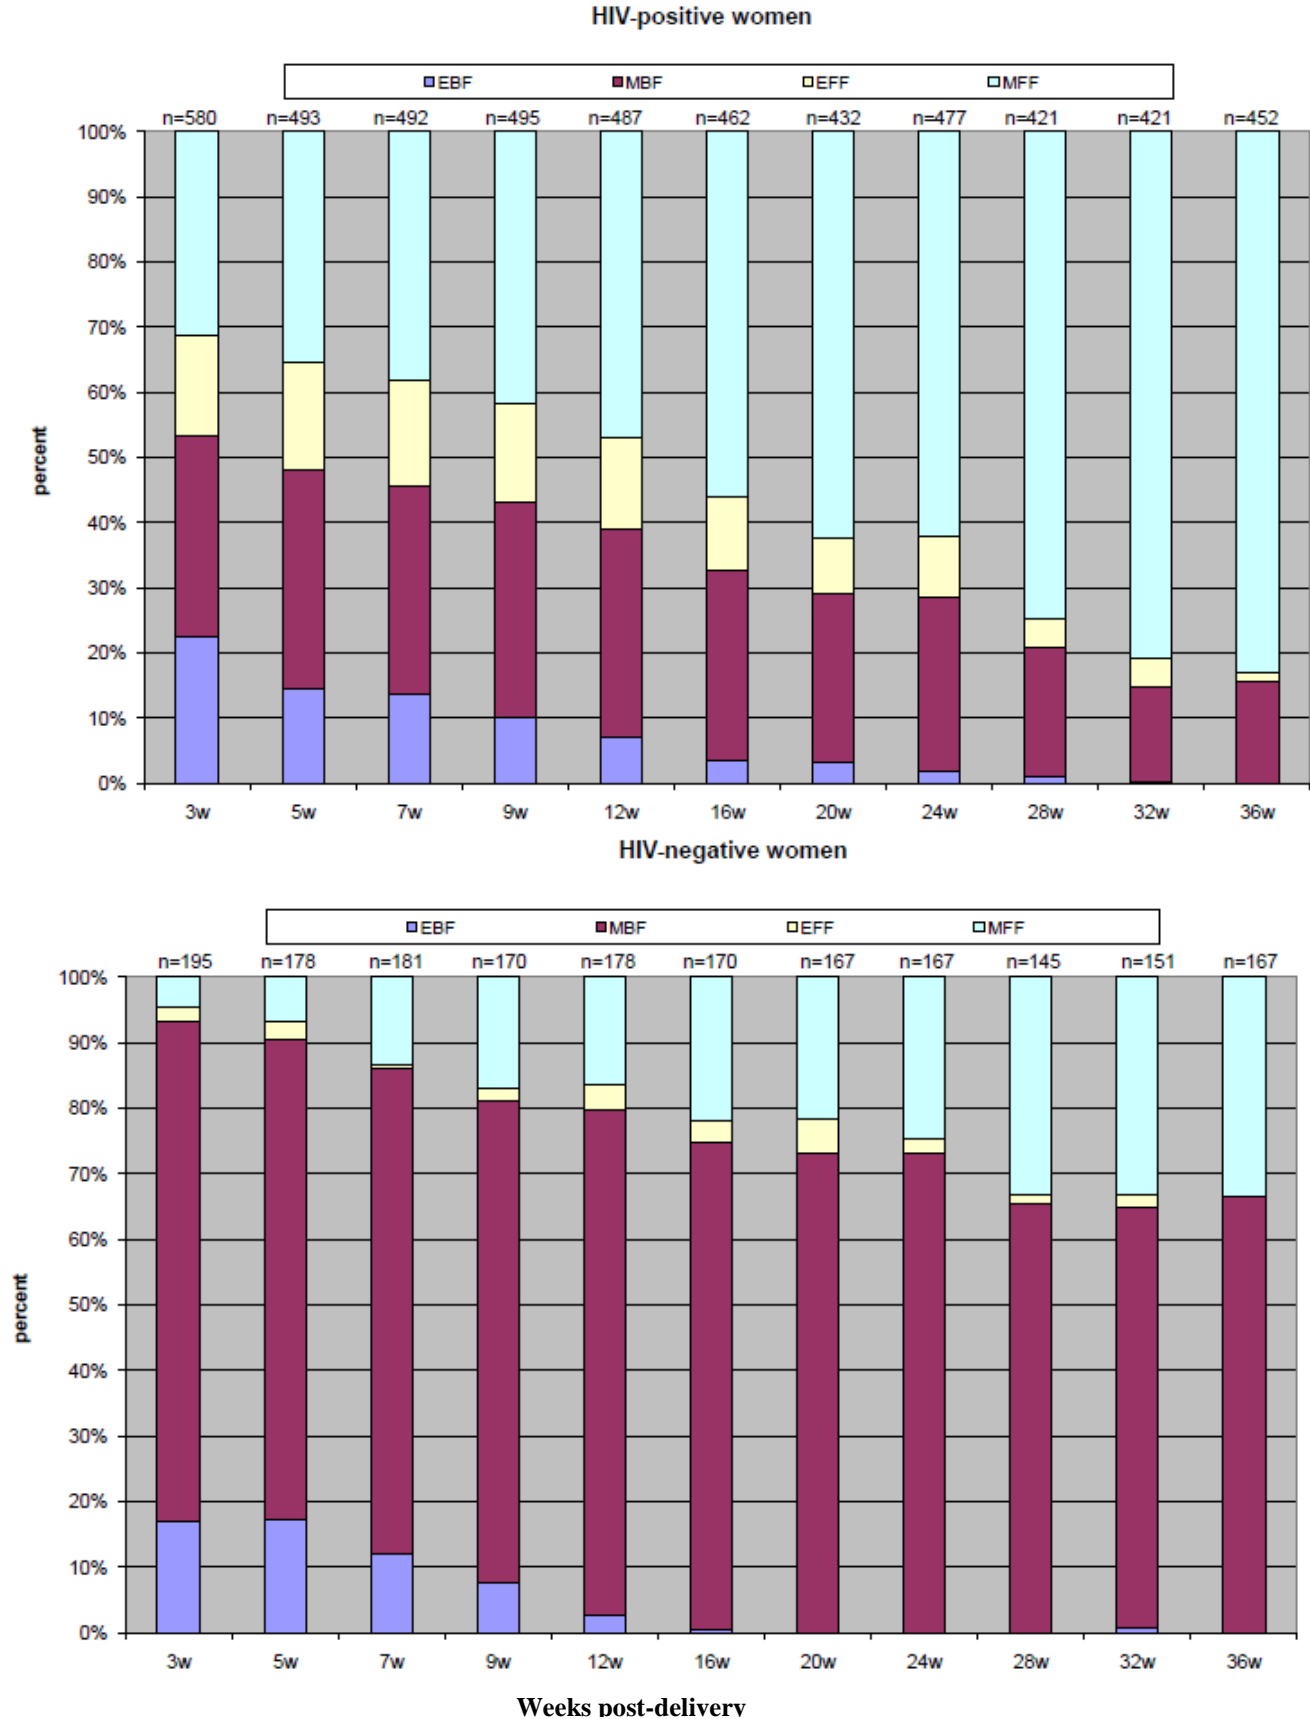

**Footnote:** EBF – Exclusive Breastfeeding; MBF – Mixed Breastfeeding; EFF – Exclusive Formula feeding; MFF – Formula milk + other fluids and foods. No breastmilk n=sample size for which feeding data available at each time point. Pearson chi-squared p-value for comparison between HIV positive and negative women <0.0001 for all time points
